# Supplementary material for: Casein kinase 1.2 over expression restores stress resistance to Leishmania donovani HSP23 null mutants
Source: PubMed Central journal article supplement (PMC7525241; doi:10.1038/s41598-020-72724-x), 2020-09-29
Supplement: 41598_2020_72724_MOESM1_ESM.pdf [file 41598_2020_72724_MOESM1_ESM.pdf]

## **Casein Kinase 1.2 Over Expression Restores Stress Resistance to *Leishmania donovani* HSP23 Null Mutants**

Constanze Kröber-Boncardo<sup>1</sup>, Stephan Lorenzen<sup>2</sup>, Christine Brinker<sup>1</sup>, and Joachim Clos<sup>1\*</sup>

<sup>1</sup>Leishmania Group and <sup>2</sup>Dept. of Epidemiology, Bernhard Nocht Institute for Tropical Medicine, Hamburg, Germany

\* Corresponding author:

Joachim Clos, Bernhard Nocht Institute for Tropical Medicine, Bernhard Nocht St 74,  
D-20359 Hamburg, Germany, email clos@bnitm.de, phone +49 40 42818 481

## Supplementary Information

Table S1

| Primers used for CK1.2 study                 | Primer sequence 5'-3'                           |
|----------------------------------------------|-------------------------------------------------|
| <b>qPCR</b>                                  |                                                 |
| LdBPK_340230.1_fwd                           | CCATTCCTGGATTTGGCTCGG                           |
| LdBPK_340230.1_rev                           | GCATATCGCCGTCGTCATCTCC                          |
| LdBPK_351030.1_fwd                           | CACGTGTACATCATCGACTTTGG                         |
| LdBPK_351030.1_rev                           | CTCTTGCCCTTCCTTGATGGGAT                         |
| LdBPK_351040.1_fwd                           | AACTCTCCCTTCGCATTATCAG                          |
| LdBPK_351040.1_rev                           | CTCGATGAAGTAGATCGGTTGCT                         |
| LdBPK_351050.1_fwd                           | TTTTGGATTAAGCGCCTGCAAC                          |
| LdBPK_351050.1_rev                           | GAAAGTAAATGGTCGTGTAGGCG                         |
| LdBPK_351060.1_fwd                           | CAGTACTACACACACAACCCGTA                         |
| LdBPK_351060.1_rev                           | CGACAACCTTCTGGTAGACTGGA                         |
| LdBPK_351070.1_fwd                           | TAGTCTTCTACGTGCTTCTCTGC                         |
| LdBPK_351070.1_rev                           | GTGATTTGGGTTGAAGAGGACAC                         |
| LdBPK_351080.1_fwd                           | CGAGTACGGCAACTTCAACGATA                         |
| LdBPK_351080.1_rev                           | CCGGTCGTCTATGTCATCTTCTT                         |
| <b>over expression plasmids construction</b> |                                                 |
| 351030_KpnI_fwd                              | GGAGGGTACCATGAACGTGGAAGTGC                      |
| 351030_NdeI_rev                              | GGAGCATATGCTACTGCTGTTCTTGCGCAC                  |
| 351040_KpnI_fwd                              | GGAGGGTACCATGCACACGCCACCCCTCTC                  |
| 351040_NdeI_rev                              | GGAGCATATGTCACATGAAGCGAGCCGCCA                  |
| 351050_KpnI_fwd                              | GGAGGGTACCATGACCTCCCCGGCAGCCGC                  |
| 351050_NdeI_rev                              | GGAGCATATGCTAGATTCTGTTGTCTGTAAG                 |
| 351060_NdeI_fwd                              | GGAGCATATGATGACGAGCCAGTCGCACGTG                 |
| 351060_BglII_rev                             | GGAGAGATCTTTAGGGCTCCATCACCATCG                  |
| 351070_KpnI_fwd                              | GGAGGGTACCATGACCGTTCTGCCACCCAAG                 |
| 351070_NdeI_rev                              | GGAGCATATGTCACCTTGCCAAAGCGTCGG                  |
| 351080_KpnI_fwd                              | GGAGGGTACCATGGGTAAGCGAAACGAAAG                  |
| 351080_NdeI_rev                              | GGAGCATATGCTACATGGATGCGACCACGC                  |
| <b>pJC65 multiple cloning site</b>           |                                                 |
| Link-pJC65+                                  | CATGGGCCATCATCATCATCATCATCATCACGGTGGTACCA       |
| Link-pJC65-                                  | AGCTTGGTACCACCGTGATGATGATGATGATGATGATGATGATGGCC |

## Supplementary Information

Table S2: Ploidy values for chromosomes based on NGS sequence read coverages.

| CHR | HSP23+/+<br>#1-LT | HSP23+/+<br>#2-LT | HSP23+/+<br>#1-HT | HSP23+/+<br>#2-HT | HSP23-/<br>cl.2-LT | HSP23-/<br>cl.3-LT | HSP23-/<br>esc #1-LT | HSP23-/<br>esc #2-LT | HSP23-/<br>esc #1-HT | HSP23-/<br>esc #2-HT |
|-----|-------------------|-------------------|-------------------|-------------------|--------------------|--------------------|----------------------|----------------------|----------------------|----------------------|
| 1   | 1.91              | 1.61              | 1.56              | 1.63              | 1.85               | 1.89               | 1.66                 | 1.70                 | 1.74                 | 1.69                 |
| 2   | 2.12              | 1.95              | 1.96              | 2.06              | 2.35               | 2.20               | 2.03                 | 2.09                 | 2.13                 | 2.00                 |
| 3   | 1.80              | 1.78              | 1.87              | 1.81              | 1.97               | 2.02               | 1.69                 | 1.84                 | 1.86                 | 2.37                 |
| 4   | 1.70              | 1.79              | 1.80              | 1.80              | 1.98               | 1.93               | 1.87                 | 1.85                 | 1.87                 | 1.83                 |
| 5   | 1.82              | 1.74              | 1.73              | 2.22              | 1.86               | 2.02               | 1.77                 | 1.87                 | 1.85                 | 1.78                 |
| 6   | 1.95              | 1.95              | 1.94              | 1.96              | 2.06               | 2.10               | 1.93                 | 1.98                 | 2.06                 | 1.95                 |
| 7   | 2.07              | 1.92              | 1.95              | 1.93              | 2.08               | 2.00               | 1.98                 | 1.98                 | 2.05                 | 1.96                 |
| 8   | 2.66              | 2.78              | 2.00              | 2.48              | 3.06               | 3.07               | 2.92                 | 2.84                 | 2.79                 | 2.55                 |
| 9   | 1.77              | 1.86              | 1.80              | 1.76              | 1.97               | 1.94               | 1.88                 | 1.92                 | 1.88                 | 1.87                 |
| 10  | 1.94              | 1.99              | 2.01              | 1.97              | 2.07               | 2.08               | 1.96                 | 1.99                 | 1.97                 | 1.99                 |
| 11  | 2.09              | 2.14              | 2.26              | 2.12              | 2.05               | 2.09               | 2.15                 | 2.05                 | 2.08                 | 2.12                 |
| 12  | 3.04              | 3.11              | 2.92              | 2.51              | 3.03               | 3.01               | 2.05                 | 1.99                 | 2.01                 | 2.05                 |
| 13  | 2.02              | 1.90              | 2.10              | 1.90              | 1.97               | 1.91               | 1.96                 | 1.96                 | 1.92                 | 1.88                 |
| 14  | 1.82              | 1.86              | 1.95              | 2.22              | 1.97               | 1.91               | 2.71                 | 2.71                 | 2.66                 | 2.02                 |
| 15  | 1.94              | 1.84              | 1.97              | 2.17              | 1.96               | 1.91               | 1.98                 | 1.97                 | 1.92                 | 1.86                 |
| 16  | 1.99              | 2.01              | 2.04              | 1.97              | 2.19               | 2.03               | 2.07                 | 2.10                 | 2.07                 | 2.08                 |
| 17  | 2.10              | 2.05              | 1.99              | 1.96              | 2.09               | 2.02               | 1.98                 | 2.05                 | 2.05                 | 1.99                 |
| 18  | 2.02              | 2.07              | 2.11              | 2.29              | 1.98               | 1.93               | 1.99                 | 2.00                 | 1.96                 | 1.98                 |
| 19  | 1.93              | 1.98              | 1.96              | 1.96              | 1.97               | 2.00               | 2.06                 | 1.97                 | 1.96                 | 1.93                 |
| 20  | 1.95              | 2.06              | 1.84              | 1.50              | 2.08               | 2.02               | 2.00                 | 1.96                 | 2.01                 | 2.04                 |
| 21  | 1.98              | 1.99              | 2.04              | 2.01              | 2.07               | 2.01               | 1.99                 | 2.02                 | 2.02                 | 2.00                 |
| 22  | 2.01              | 1.98              | 1.99              | 2.01              | 2.06               | 2.01               | 2.00                 | 2.00                 | 1.99                 | 1.95                 |
| 23  | 3.11              | 3.22              | 3.25              | 2.67              | 3.15               | 3.16               | 2.18                 | 2.08                 | 2.11                 | 2.14                 |
| 24  | 2.01              | 1.96              | 2.00              | 2.01              | 1.98               | 1.93               | 1.98                 | 2.00                 | 1.98                 | 1.98                 |
| 25  | 1.92              | 1.99              | 1.98              | 2.00              | 1.99               | 1.94               | 1.99                 | 1.97                 | 2.01                 | 1.97                 |
| 26  | 2.95              | 3.05              | 2.98              | 2.82              | 3.15               | 2.87               | 3.11                 | 3.03                 | 3.02                 | 3.01                 |
| 27  | 2.14              | 2.16              | 2.17              | 2.00              | 2.07               | 2.01               | 2.17                 | 2.06                 | 2.05                 | 2.07                 |
| 28  | 1.96              | 2.11              | 2.17              | 2.00              | 2.00               | 1.94               | 2.10                 | 2.05                 | 2.04                 | 2.03                 |
| 29  | 2.17              | 2.18              | 2.12              | 2.00              | 1.99               | 2.01               | 2.09                 | 2.05                 | 2.01                 | 2.04                 |
| 30  | 2.10              | 2.20              | 2.19              | 2.01              | 1.98               | 2.00               | 2.17                 | 2.05                 | 2.05                 | 2.12                 |
| 31  | 4.11              | 4.30              | 4.37              | 4.07              | 4.16               | 3.88               | 4.32                 | 4.16                 | 4.17                 | 4.18                 |
| 32  | 2.12              | 2.17              | 2.18              | 2.02              | 2.00               | 1.94               | 2.18                 | 2.02                 | 2.09                 | 2.08                 |
| 33  | 2.09              | 2.16              | 2.17              | 2.03              | 2.06               | 1.94               | 2.17                 | 2.00                 | 1.97                 | 2.01                 |
| 34  | 2.09              | 2.12              | 2.11              | 1.96              | 1.98               | 1.92               | 2.16                 | 2.00                 | 1.94                 | 1.97                 |
| 35  | 2.11              | 2.13              | 2.13              | 1.91              | 2.93               | 2.87               | 2.36                 | 2.26                 | 1.98                 | 2.02                 |
| 36  | 1.95              | 2.16              | 2.19              | 1.91              | 1.97               | 1.91               | 2.16                 | 2.00                 | 1.98                 | 2.05                 |

## Supplementary Information

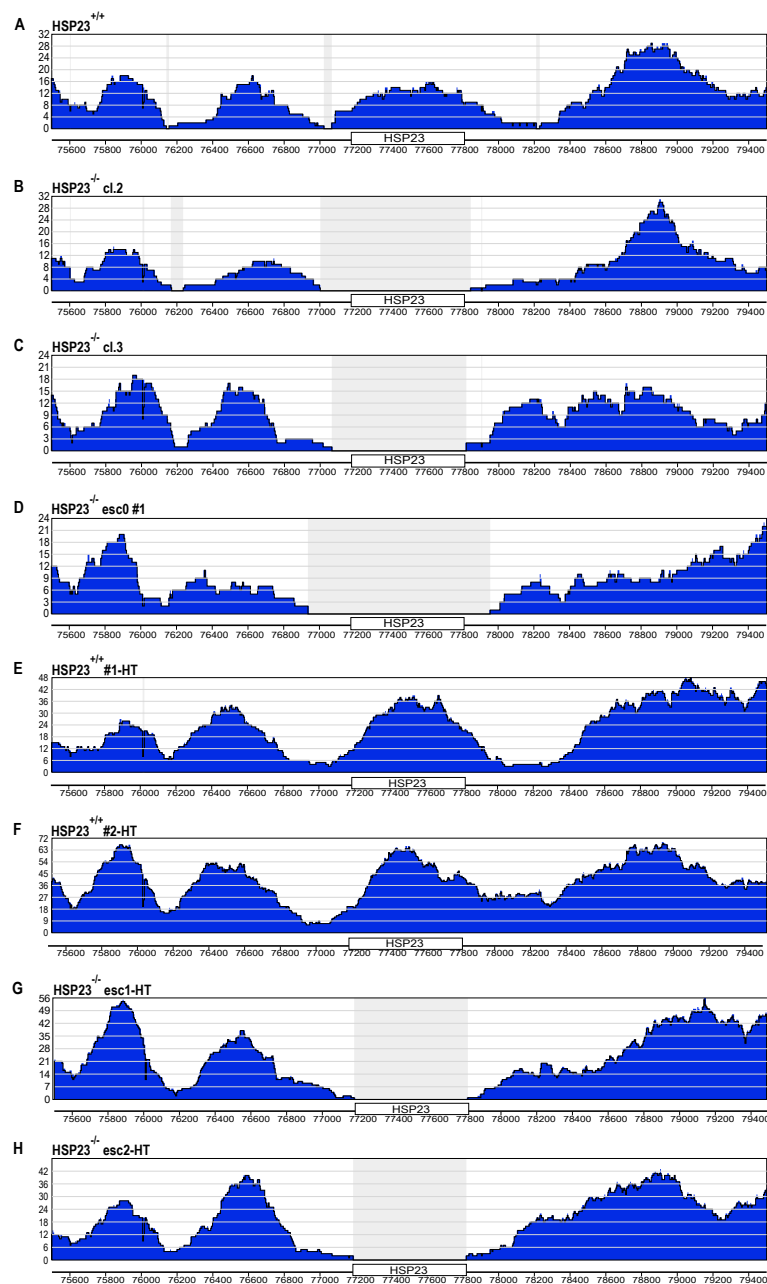

**Fig S1 Verification of the *HSP23* gene replacement.** Sequence reads from each analysed strain (A-H) were aligned to the reference DNA sequence consisting of chromosome 34 (TriTrypDB-46\_LdonovaniBPK282A1\_Genome.fasta). The Y-axis represents the number of reads and the X-axis shows the nucleotide position (bp) on chromosome 34. Grey shaded areas denote complete lack of aligned reads.

# Supplementary Information

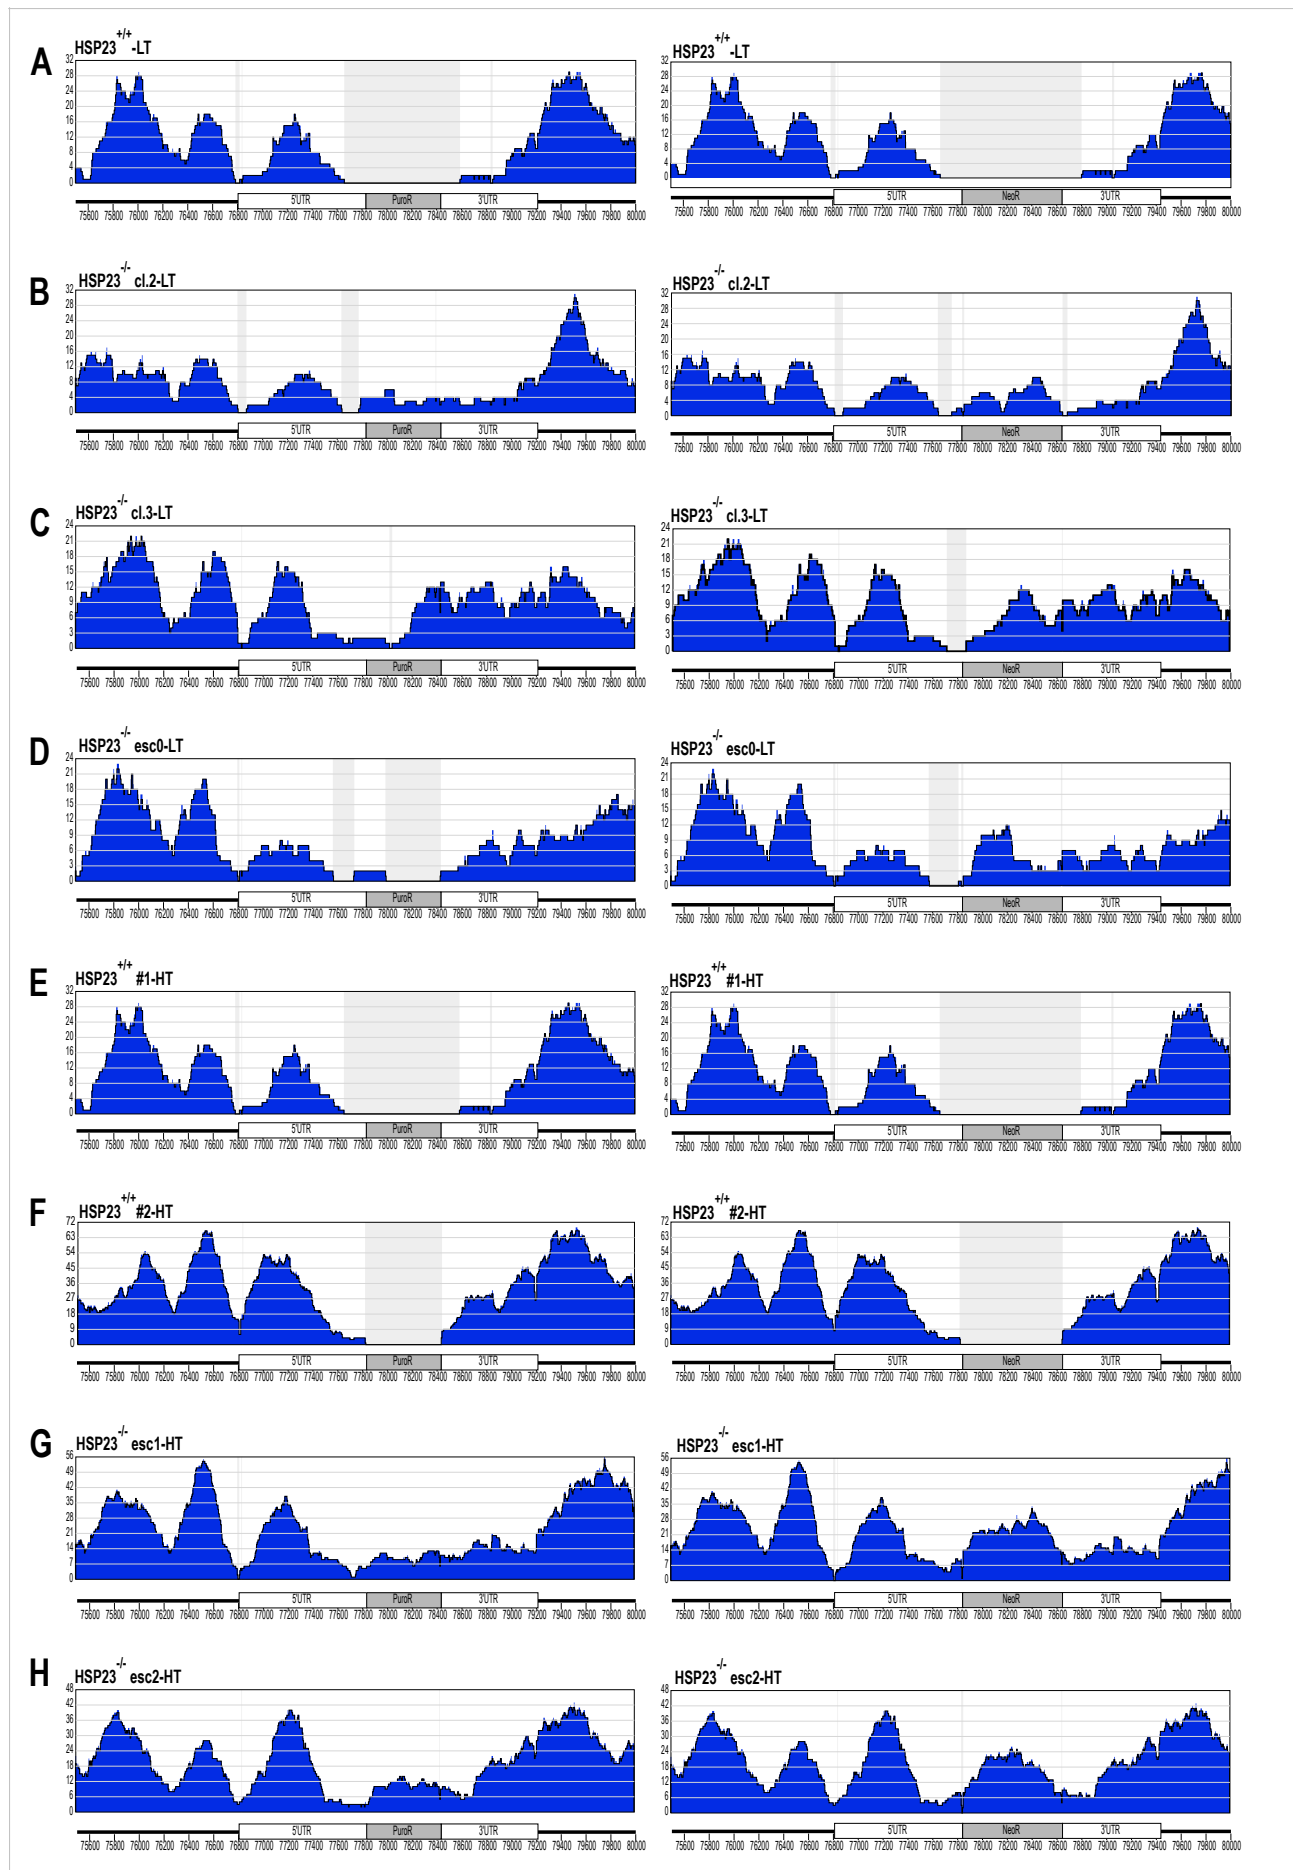

## Supplementary Information

### Fig S2 Verification of the *HSP23* gene replacement by the respective resistance cassettes.

Sequence reads from each analysed strain (A-H) were aligned to the *in silico*-designed reference DNA sequences consisting of the *L. donovani* genome (DNA) sequence of chromosome 34 (TriTrypDB-46\_LdonovaniBPK282A1\_Genome.fasta) with the expected insertion of antibiotic resistance cassettes (NeoR = Neomycin; PuroR = Puromycin). The Y-axis represents the number of reads and the X-axis shows the nucleotide position (bp) on chromosome 34. Grey shaded areas denote complete lack of aligned reads.

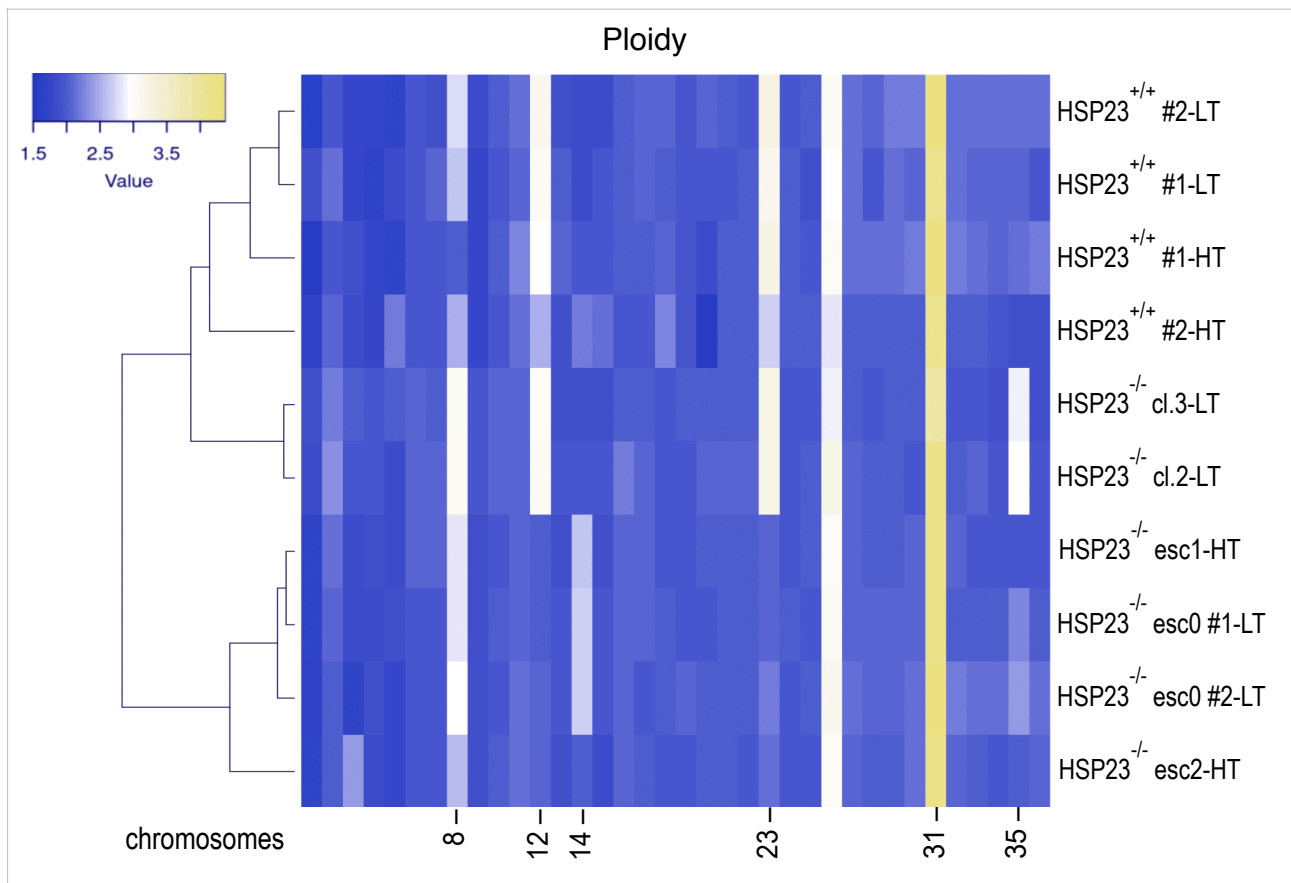

**Fig S3: Dendrogram of chromosomal ploidy profiles.** Heat map showing ploidy levels across all samples. The x-axis indicates individual chromosomes of *L. donovani*. Color scale indicates low (blue) to high (yellow) ploidy. The dendrogram shows clustering of the strains based on similarity of ploidy profiles and was generated by Pearson distance measurements.

## Supplementary Information

**Fig S4 Abundance of mRNA levels in transgenic over expression lines.** mRNA was isolated from transgenic over expression lines HSP23<sup>-/-</sup> [Mix]-LT and HSP23<sup>-/-</sup> [Mix]-HT, selected at 25°C or 37°C, respectively. mRNA levels were determined for all genes of the six-gene cluster on chromosome 35 (LdBPK\_351030-351080) and normalised to WT levels (set to 1).

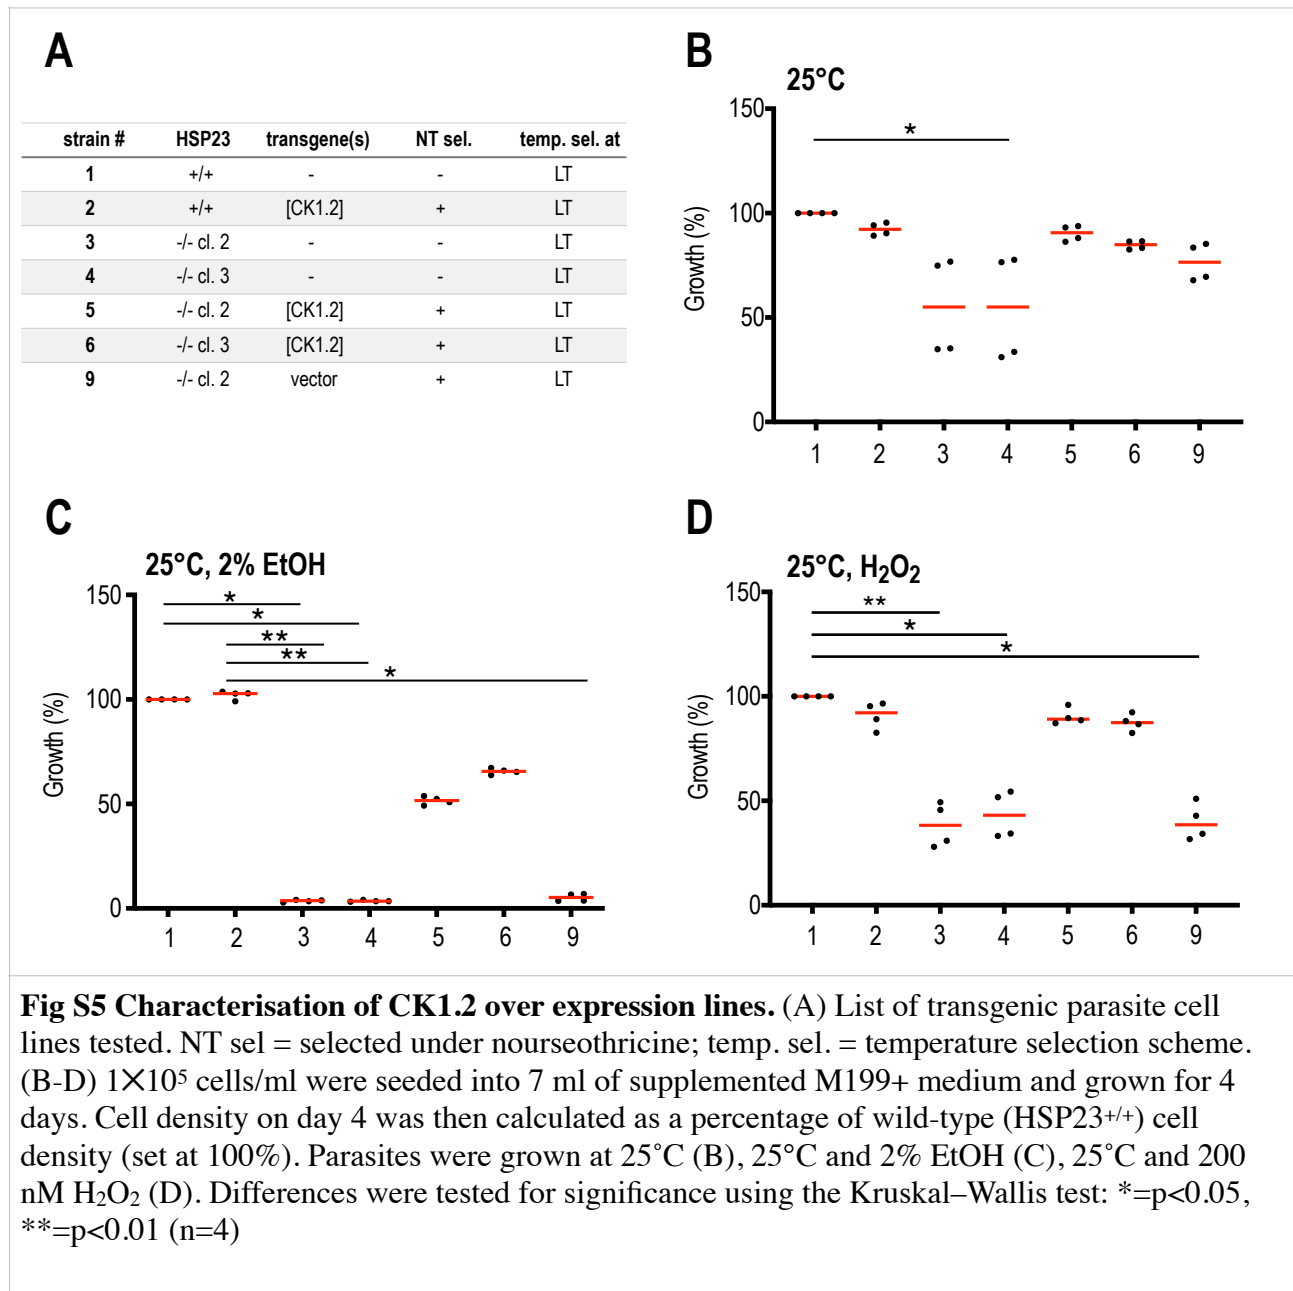



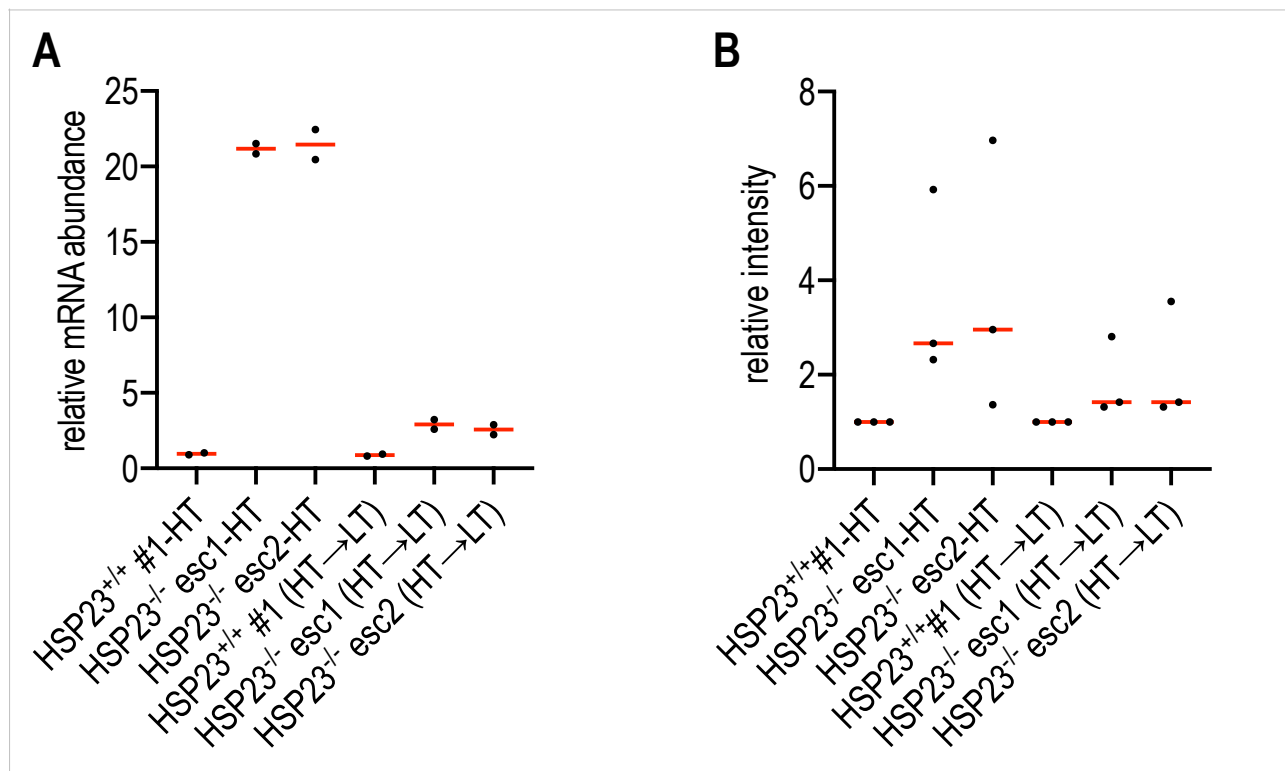

**Fig S6 Abundance of CK1.2 in HSP23<sup>-/-</sup> esc1/2 mutants under different temperatures.** CK1.2 mRNA (n=2) (A) and protein (n=3) (B) abundance were determined for HSP23<sup>-/-</sup> esc1/2 mutants that were selected first at HT (37°C) and were then transferred back to LT (25°C)(HT→LT). mRNA and protein samples were taken 30 days after transfer to LT conditions. For Western blot analysis, signal intensities were quantified using the Image J Software and were normalised to the WT (set to 1).

|          | CK1 =<br>S/TXXS/T                                                                                                                                 | CK1 =<br>S/TXXS/T |
|----------|---------------------------------------------------------------------------------------------------------------------------------------------------|-------------------|
| LdHsp23  | 1 MSTSGPLVPPISWAQRPEYVLITIPLDQT <u><b>TGV</b></u> SVEIKDEGRELC---FACSSPEHKQYACTIHFYGVIS <u><b>SEESQ</b></u> HVVVRPRQIELKLRKFKSKSLEDANDDEVEWPRLTKE | 107               |
| LmjHsp23 | 1 MSSSGPLAPPISWAQRPEYVLITIPLDQT <u><b>TGV</b></u> SVEIKDEGRELH---FACSSPEHKQYACTIHFYGVIS <u><b>SEESQ</b></u> HVVVRPRQIELKLRKFKSKSLEDANDDEVEWPRLTKE | 107               |
| LbrHsp23 | 1 MSASGSLVPPISWAQRPEYVLITIPLDQT <u><b>TGV</b></u> TVEIKDEGRELL---FACCAPEGKQYACTIHFYGAIS <u><b>SEESQ</b></u> HVVVRPRQIELKLRKFKSKSLEDANDDEVEWPRLTKE | 106               |
| LmxHsp23 | 1 MSTSSPLAPPISWAQRPEYVLITIPLDQTTVCVVEIKDEGKELR---FACSSPEHKQYACTIHFYGAIS <u><b>SEESQ</b></u> HVVVRPRQIELKLRKFKSKSLEDANDDEVEWPRLTKE                 | 107               |
| LdP23    | 1 MS----HLPKWAERKDRLFITVEA <u><b>STPT</b></u> DVQVNFQEKTVSISNGITAKGSQPHALKDELHLLKEIVPEESTFKVLGMAIQICAIK-----EKGYNRLVDE                            | 95                |
| LdHsp23  | 108 KAKYPN--ISIDWSKWKDENDDECAADDLGNFGLSGGDAMDQYSEMLSQLMQAQQQKDAEESAGLPPGTIPFGSARGQEATHGACAVAGDDDGMPPLEEDT---                                      | 209               |
| LmjHsp23 | 108 KSKYPN--ITIDWSKWKDENDDECAADDLGNFGLSGGDAMDQYSEMLSQLMQAQQQKDAEESADLPPGTIPFGSARGQEATHGAS <u><b>SAET</b></u> GDDDGMPPLEEDT---                     | 209               |
| LbrHsp23 | 107 KVKYPN--ITIDWSKWKDE--DEGATDDLGNFGLSGGDAMDQYSEMLSQLMQTQKDAEELAGLPPGTIPFGSARGQEATHGASAAAGDDSEMPPLEDDM---                                        | 207               |
| LmxHsp23 | 108 KVKYPN--ITIDWSKWKDENDDECAADDLGNFGLSGGDAMDQYSEMLSQLMQAQQQDAEESAGLPTGTIPFGSARGQEATHGTSAGAGDDDGMPPLEEDT---                                       | 209               |
| LdP23    | 96 <u><b>STKATKSWLS</b></u> ADWNLWKDEDEAEVAAASNFGGYG--DMGGMDMASMMGGMGMDMESMMAS--MGKDAGGDSDEBELDDGAEADGCTEEEPAAIDSLNA                              | 199               |

**Fig S7 Protein sequence alignments of HSP23 orthologs in Leishmania spp. and L. donovani P23 protein.** Putative CK1 phosphorylation sites (S/TXXS/T) are underlined and in bold font.

## Supplementary Information

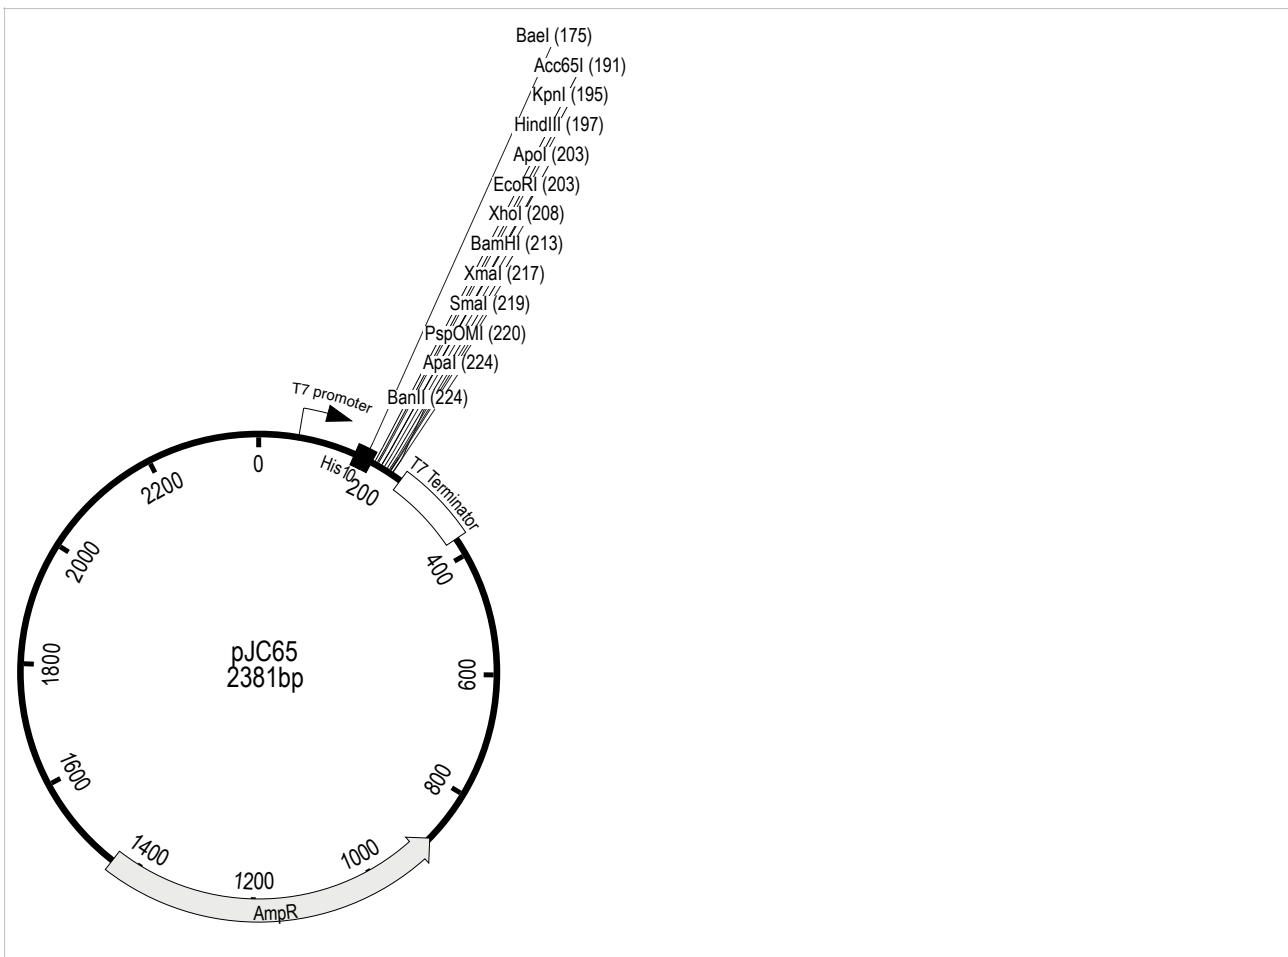

**Fig S8 Schematic depiction plasmid used for protein expression in *E.coli*.** pJC65 is derived from pJC45 (Schlüter et al., 2000), with a newly designed multiple cloning site.

## Raw Images used for Figures

Quantification of CK1.2 protein levels shown in Fig 4A+Fig4B Repeat 1-4

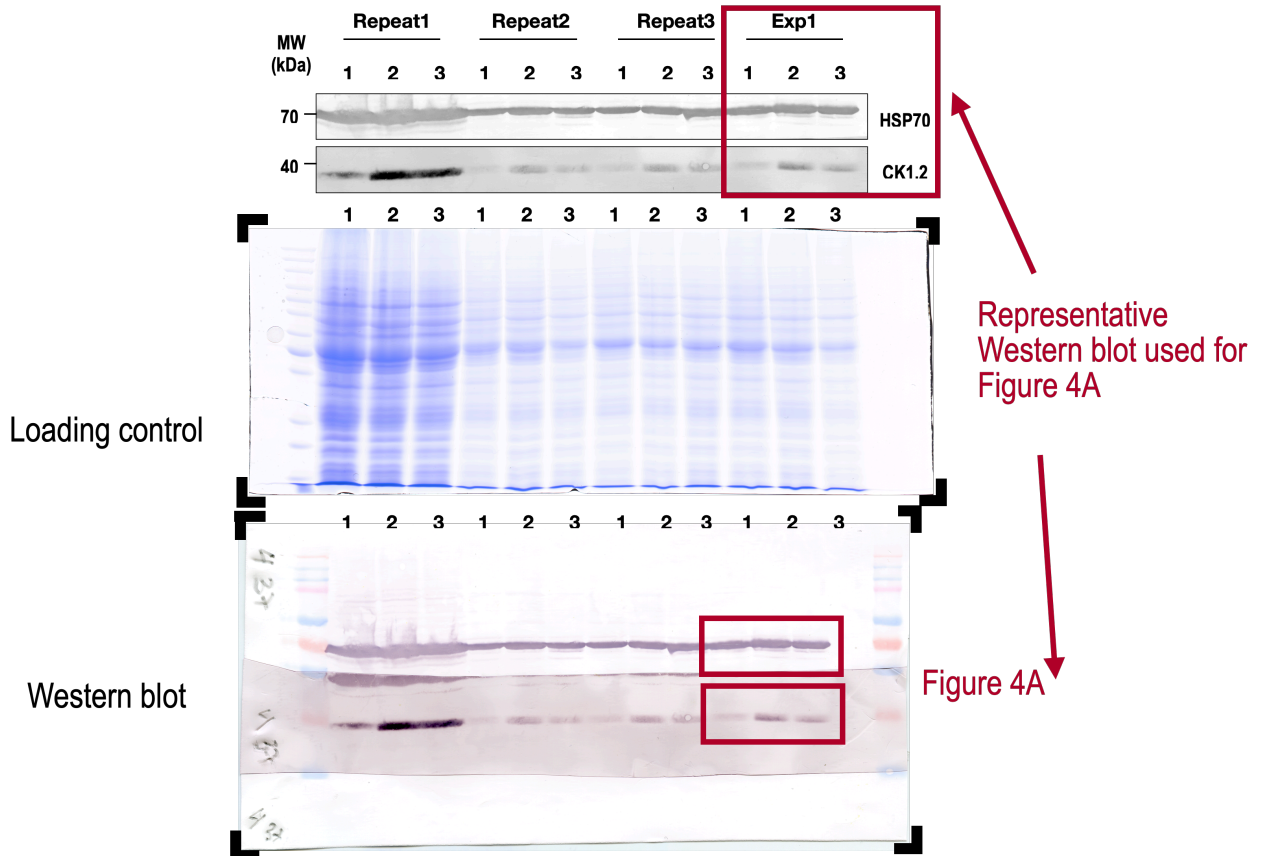

Supplementary Information

Quantification of CK1.2 protein levels shown in Fig.4B Repeat4

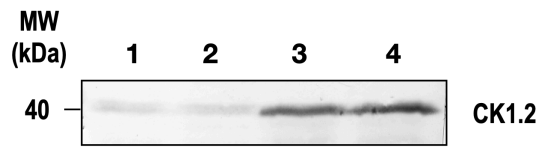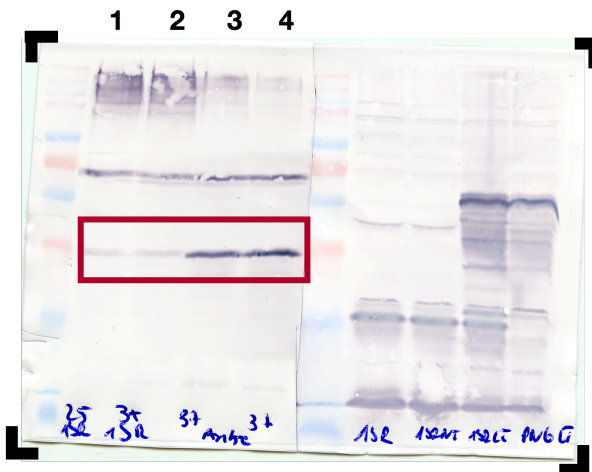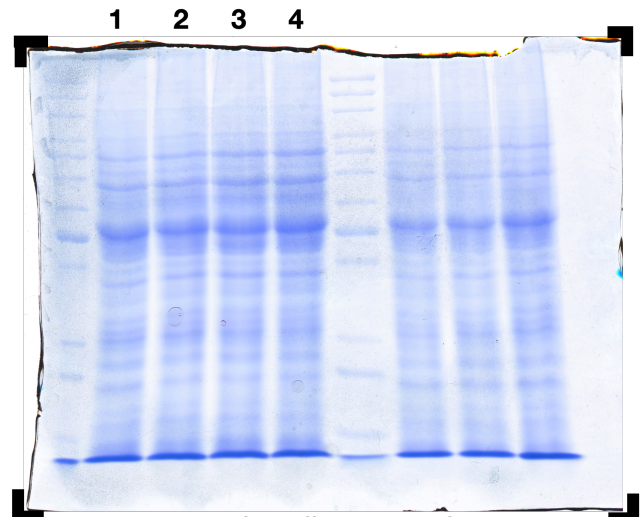

- 1: HSP23<sup>+/+</sup> -LT
- 2: HSP23<sup>+/+</sup>-HT
- 3: HSP23<sup>-/-</sup> esc #1-HT
- 4: HSP23<sup>-/-</sup> esc #2-HT

## Supplementary Information

Quantification of CK1.2 protein levels shown in Fig 4B Repeat 5

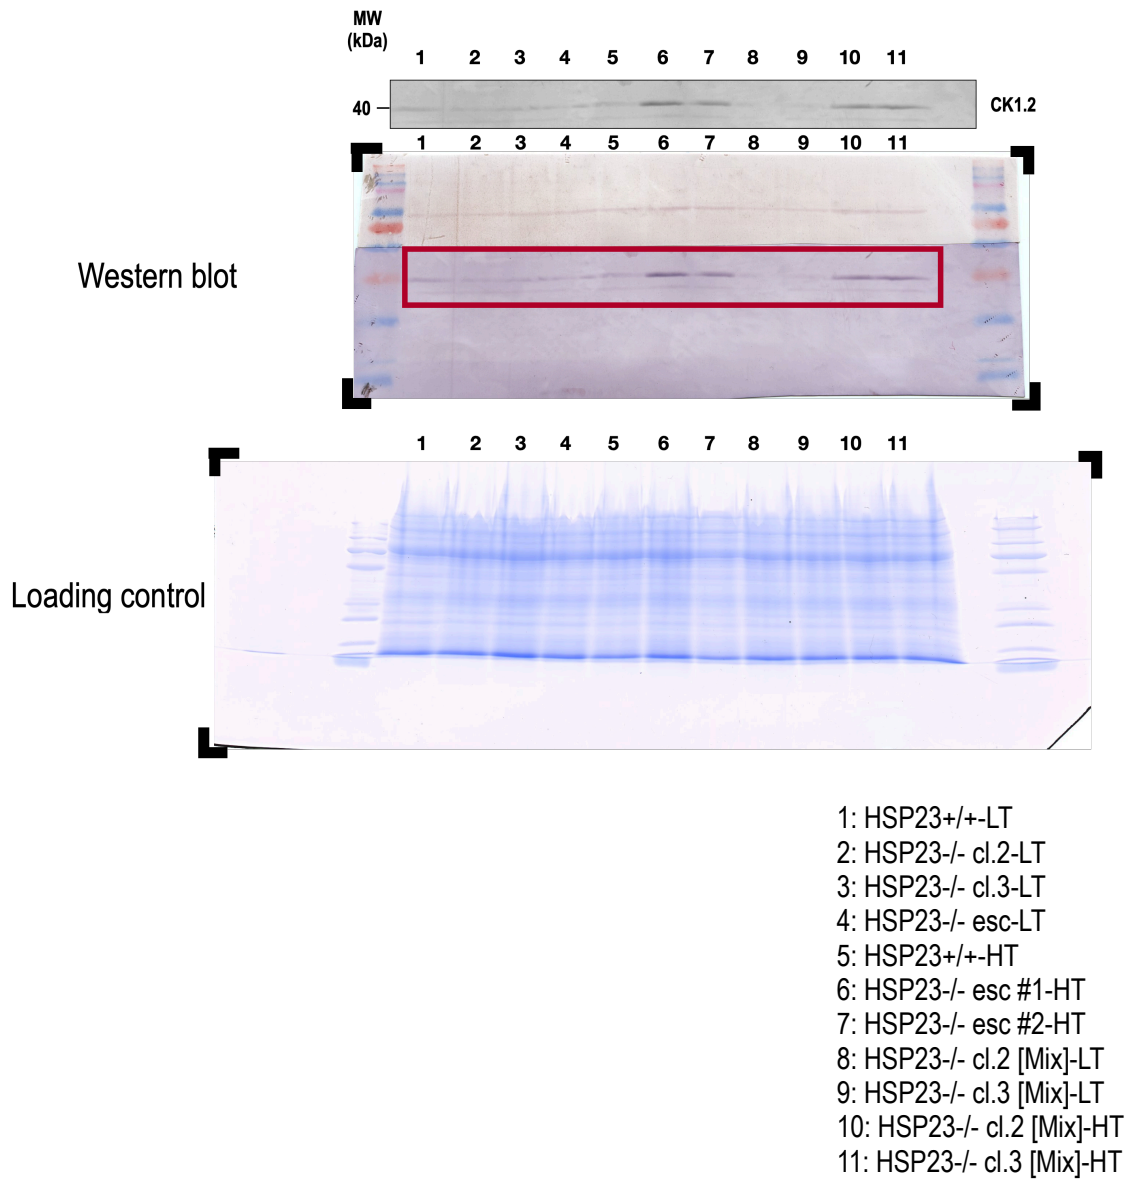

# Supplementary Information

Raw images Fig 5B (left panels)

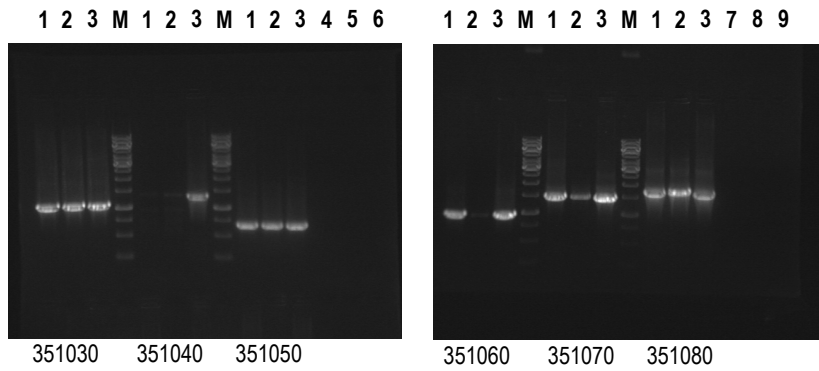

Raw image Fig 5B (right panels)

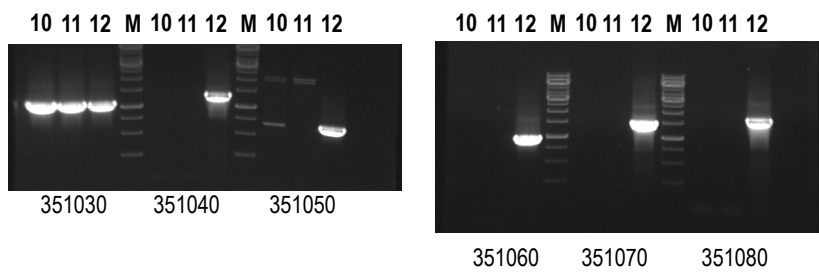

- 1 : HSP23<sup>-/-</sup> cl.2 [Mix]-LT
- 2: HSP23<sup>-/-</sup> cl.3 [Mix]-LT
- 3: (+) ctrl
- 4: (-) ctrl for LdBPK\_351030
- 5: (-) ctrl for LdBPK\_351040
- 6: (-) ctrl for LdBPK\_351050
- 7: (-) ctrl for LdBPK\_351060
- 8: (-) ctrl for LdBPK\_351070
- 9: (-) ctrl for LdBPK\_351080
- 10: HSP23<sup>-/-</sup> cl.2 [Mix]-HT
- 11: HSP23<sup>-/-</sup> cl.3 [Mix]-HT
- 12: (+) ctrl
- M : 1kb DNA ladder

## Supplementary Information

Quantification of CK1.2 protein levels shown in Fig 6F cl.2 Repeat 1

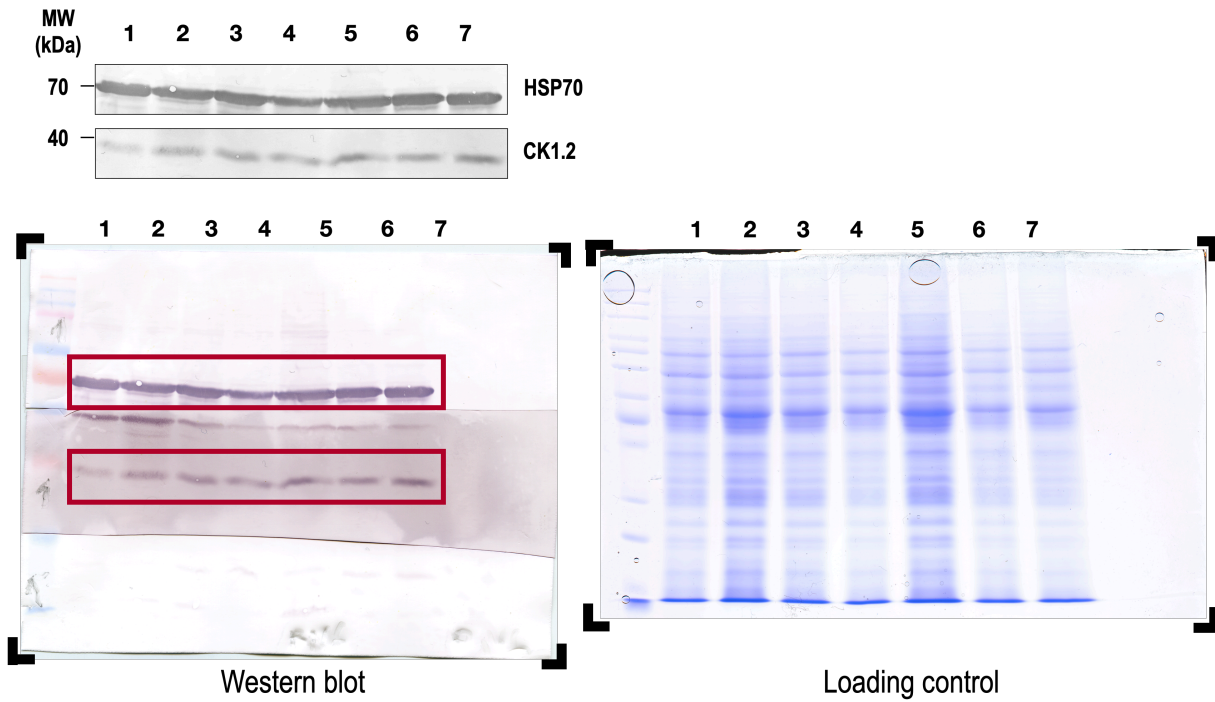

- 1: HSP23<sup>+/+</sup> -LT
- 2: HSP23<sup>-/-</sup> cl.2 [Mix ]-LT
- 3: HSP23<sup>-/-</sup> cl.2 [Mix ]-HT
- 4: HSP23<sup>-/-</sup> cl.2 [Mix ]-LT→HT
- 5: HSP23<sup>-/-</sup> cl.2 [CK1.2 ]-LT
- 6: HSP23<sup>-/-</sup> cl.2 [CK1.2 ]-HT
- 7: HSP23<sup>-/-</sup> cl.2 [CK1.2 ]-LT→ HT

Supplementary Information

Quantification of CK1.2 protein levels shown in Fig 6F cl.3 Repeat 1

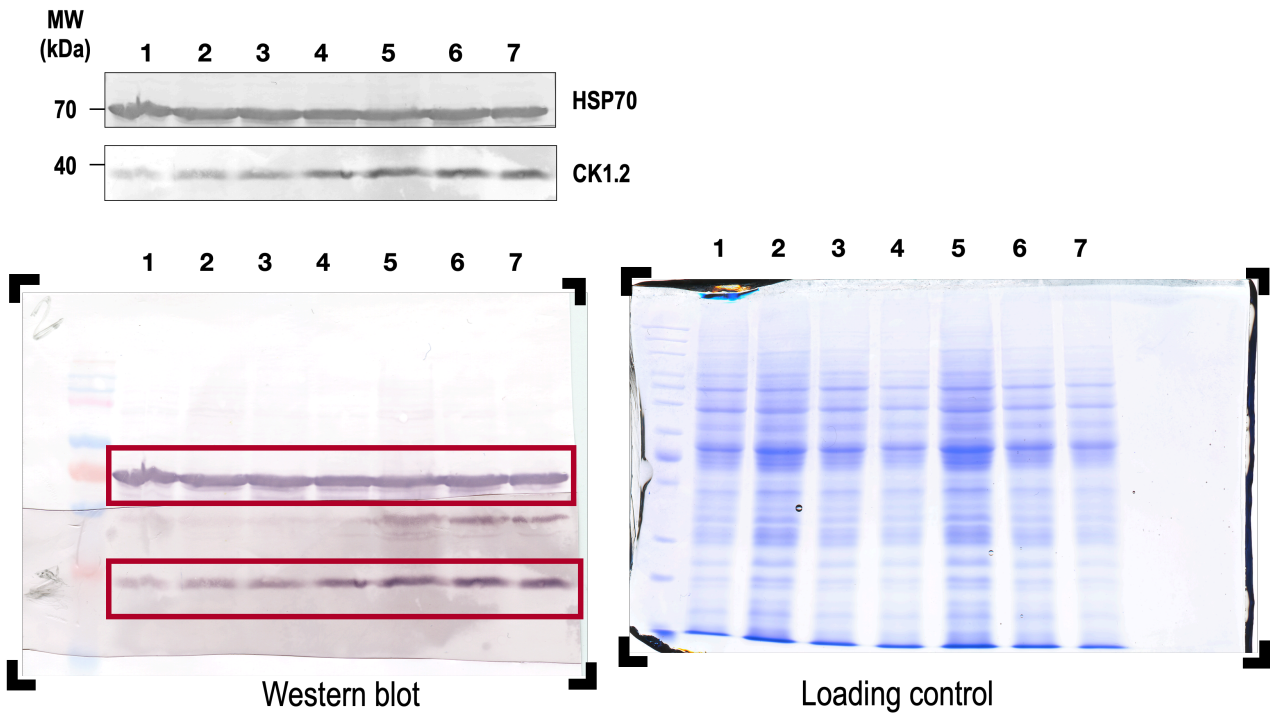

- 1: HSP23<sup>+/+</sup> -LT
- 2: HSP23<sup>-/-</sup> cl.3 [Mix ]-LT
- 3: HSP23<sup>-/-</sup> cl.3 [Mix ]-HT
- 4: HSP23<sup>-/-</sup> cl.3 [Mix ]-LT→HT
- 5: HSP23<sup>-/-</sup> cl.3 [CK1.2 ]-LT
- 6: HSP23<sup>-/-</sup> cl.3 [CK1.2 ]-HT
- 7: HSP23<sup>-/-</sup> cl.3 [CK1.2 ]-LT→ HT



Supplementary Information

Quantification of CK1.2 protein levels shown in Fig 6F cl.2 Repeat 2

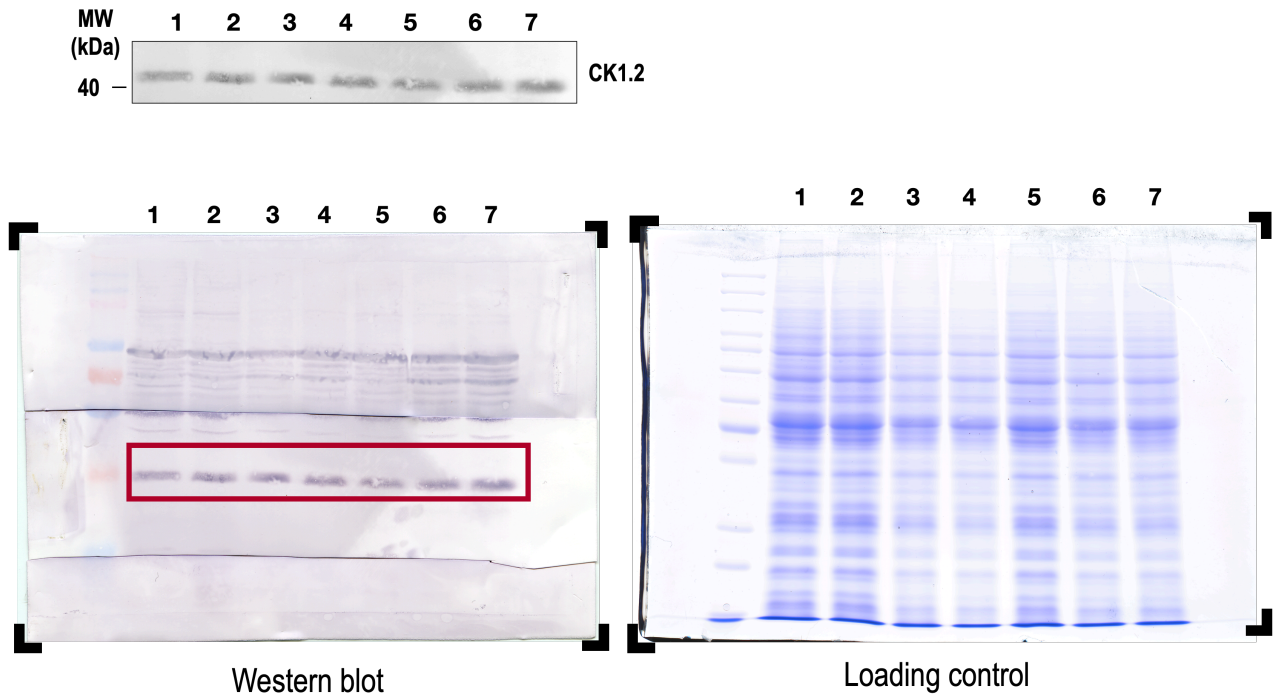

- 1: HSP23<sup>+/+</sup> -LT
- 2: HSP23<sup>-/-</sup> cl.2 [Mix ]-LT
- 3: HSP23<sup>-/-</sup> cl.2 [Mix ]-HT
- 4: HSP23<sup>-/-</sup> cl.2 [Mix ]-LT→HT
- 5: HSP23<sup>-/-</sup> cl.2 [CK1.2 ]-LT
- 6: HSP23<sup>-/-</sup> cl.2 [CK1.2 ]-HT
- 7: HSP23<sup>-/-</sup> cl.2 [CK1.2 ]-LT→ HT

Supplementary Information

Quantification of CK1.2 protein levels shown in Fig 6F cl.3 Repeat 2

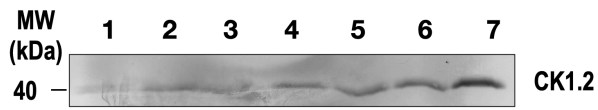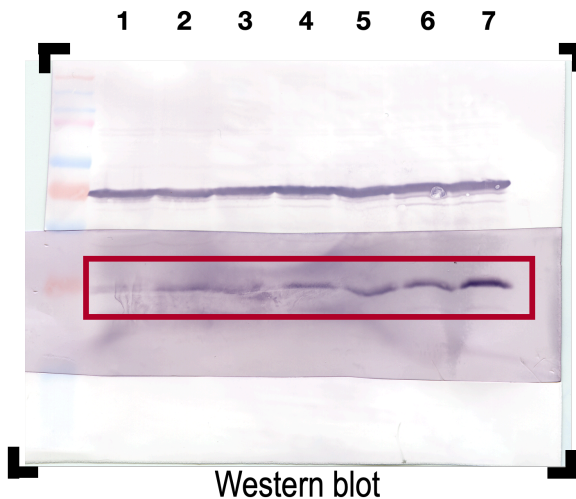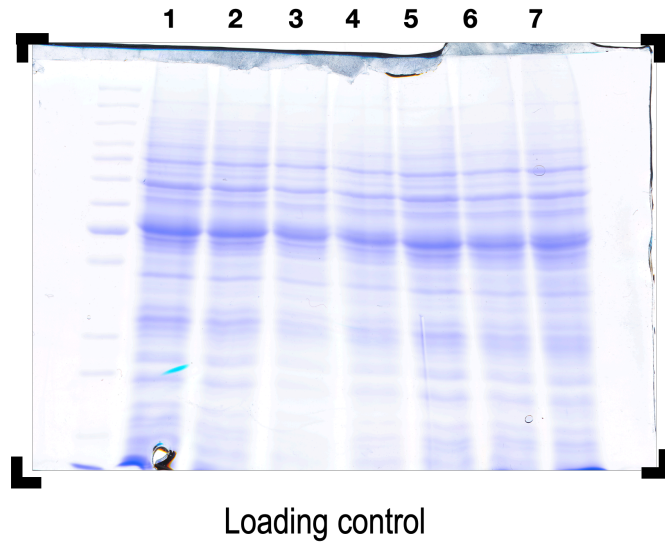

- 1: HSP23<sup>+/+</sup> -LT
- 2: HSP23<sup>-/-</sup> cl.3 [Mix ]-LT
- 3: HSP23<sup>-/-</sup> cl.3 [Mix ]-HT
- 4: HSP23<sup>-/-</sup> cl.3 [Mix ]-LT→HT
- 5: HSP23<sup>-/-</sup> cl.3 [CK1.2 ]-LT
- 6: HSP23<sup>-/-</sup> cl.3 [CK1.2 ]-HT
- 7: HSP23<sup>-/-</sup> cl.3 [CK1.2 ]-LT→ HT

# Supplementary Information

Quantification of CK1.2 protein levels shown in Fig 6F cl.2+3 Repeat 3

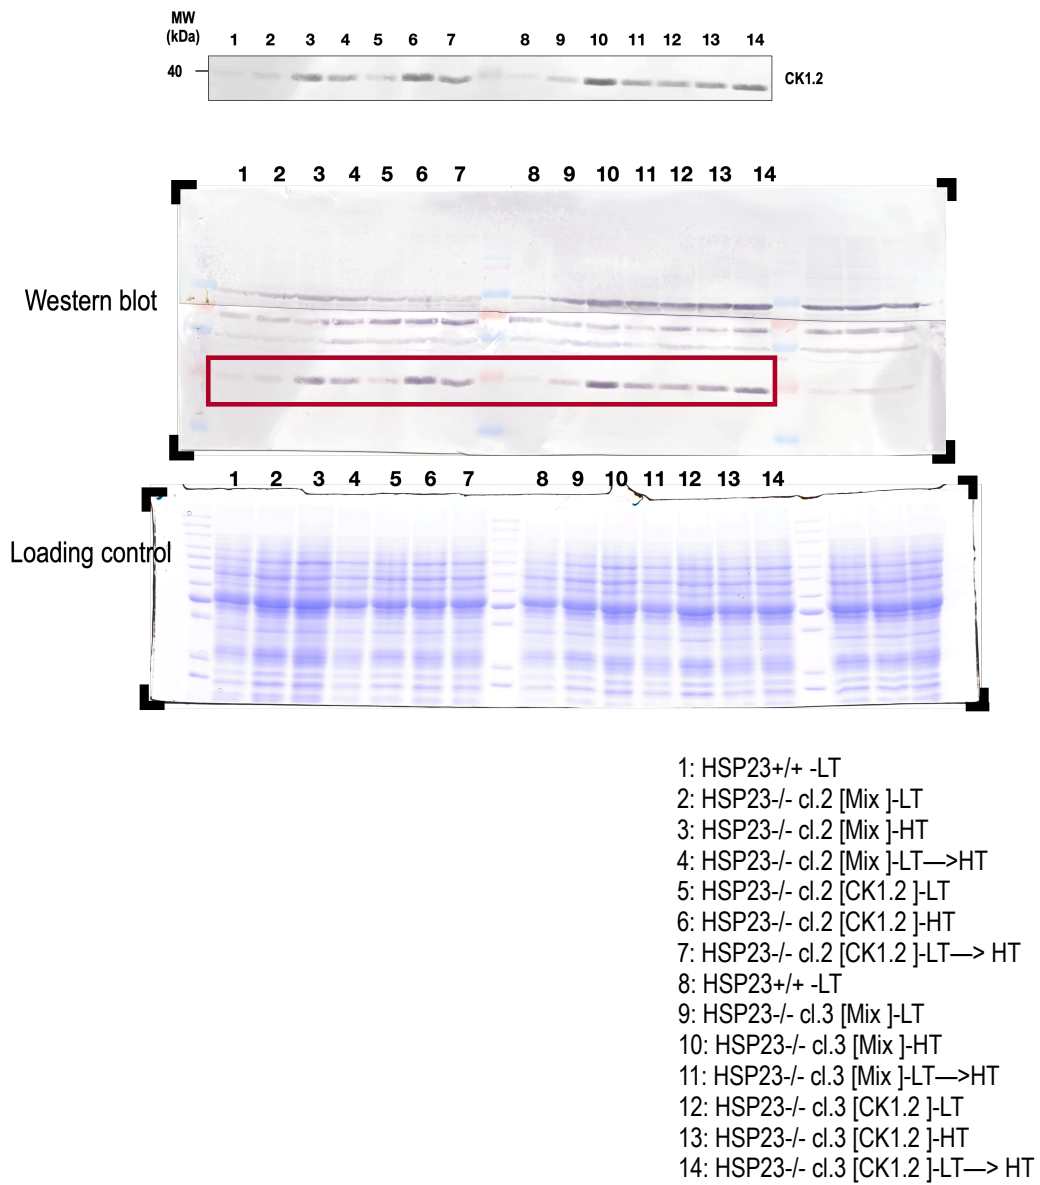

Supplementary Information

Representative Autoradiograph and Westernblot shown in Figure 7B: Repeat 1 HSP23

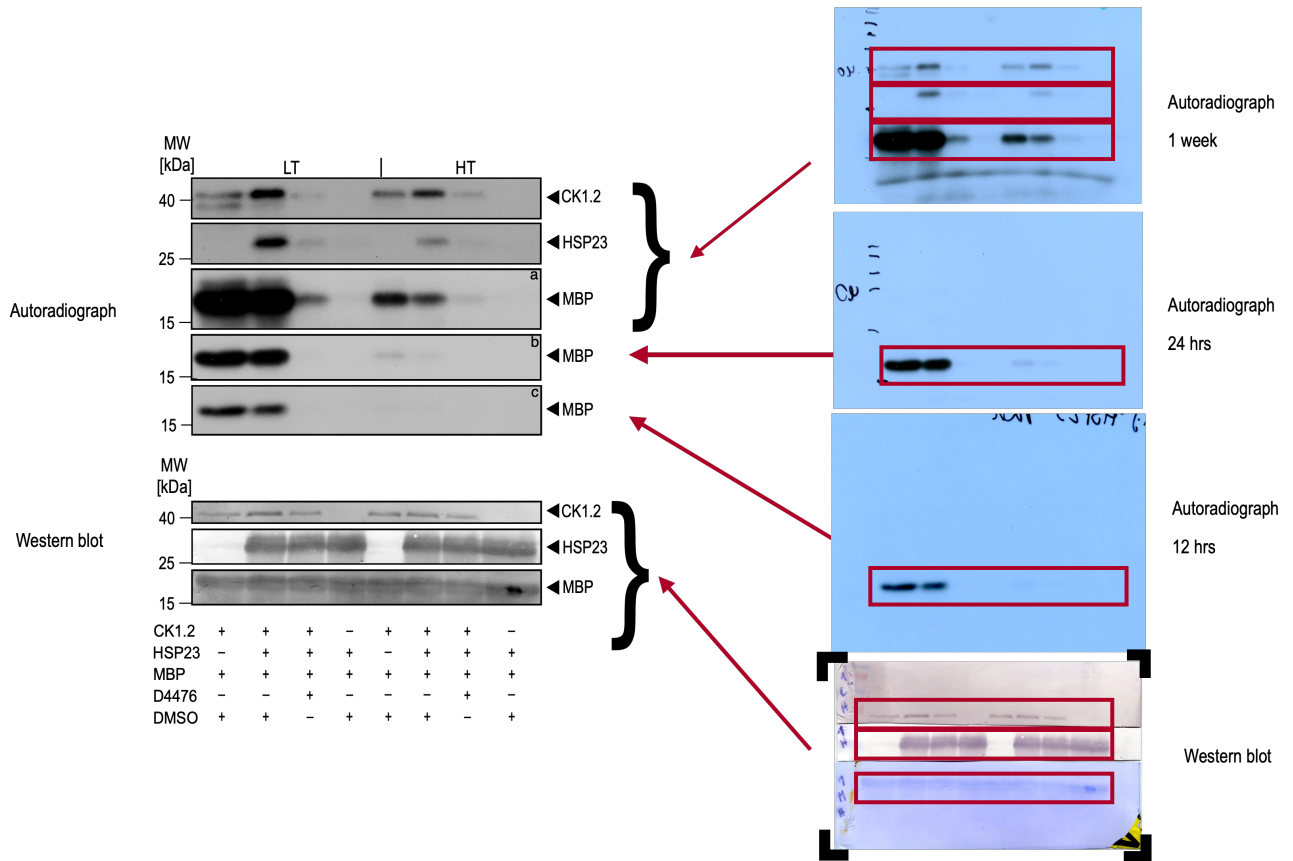

Supplementary Information

Additional data set for Fig.7: Repeat 2 HSP23

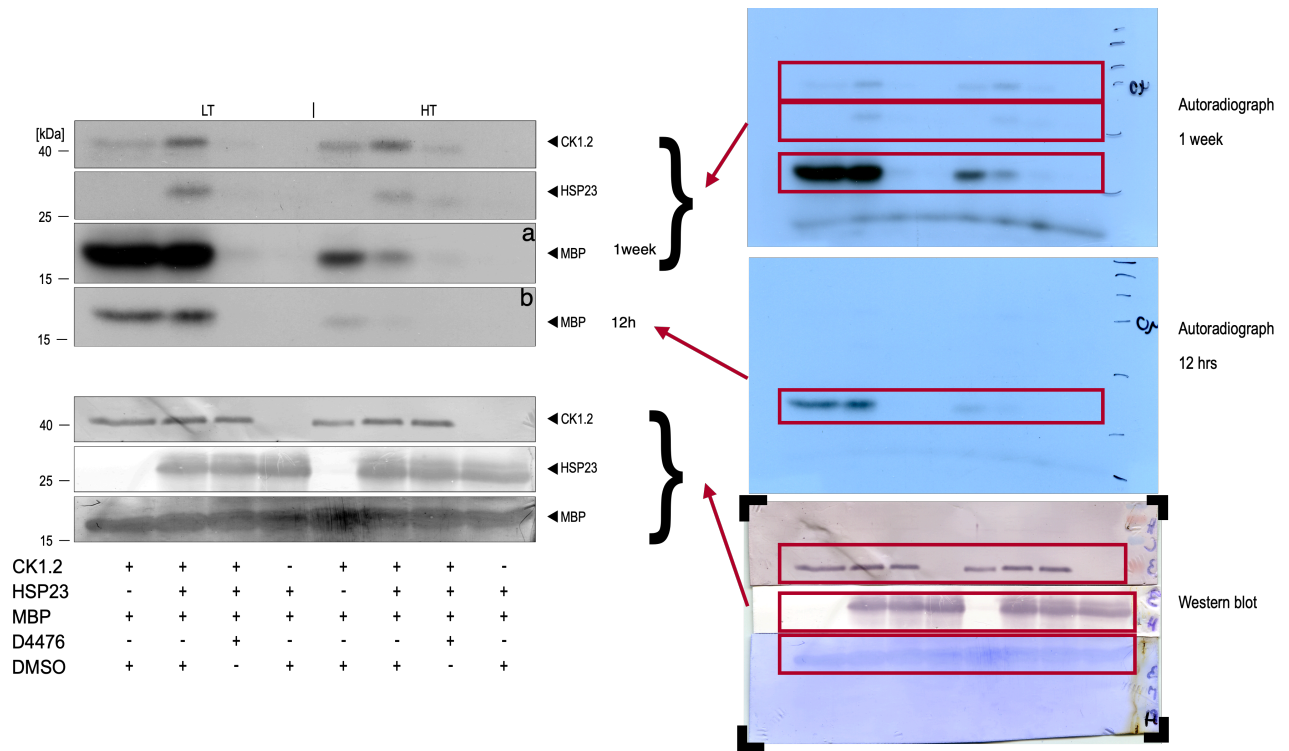

# Supplementary Information

## Additional data set for Fig.7: Repeat 3 HSP23

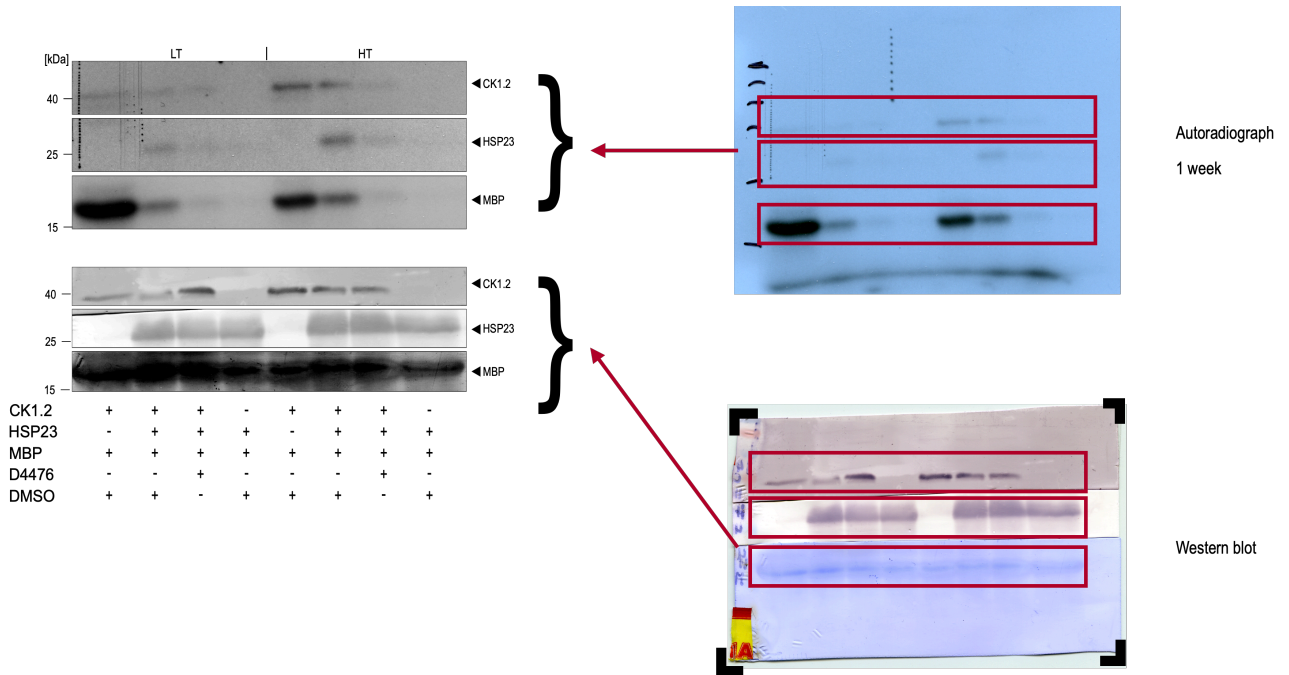

Supplementary Information

Additional data set for Fig.7: Repeat 4 HSP23

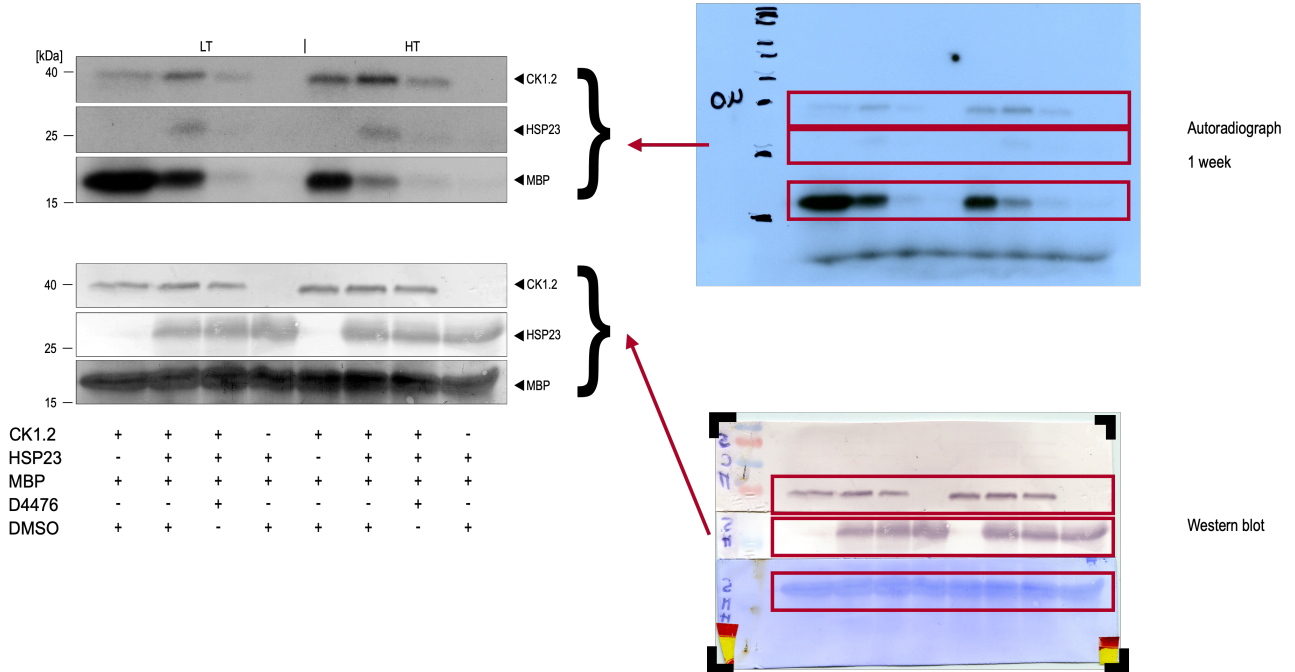

Supplementary Information

Representative Autoradiograph and Westernblot shown in Figure 7C: Repeat 1 p23

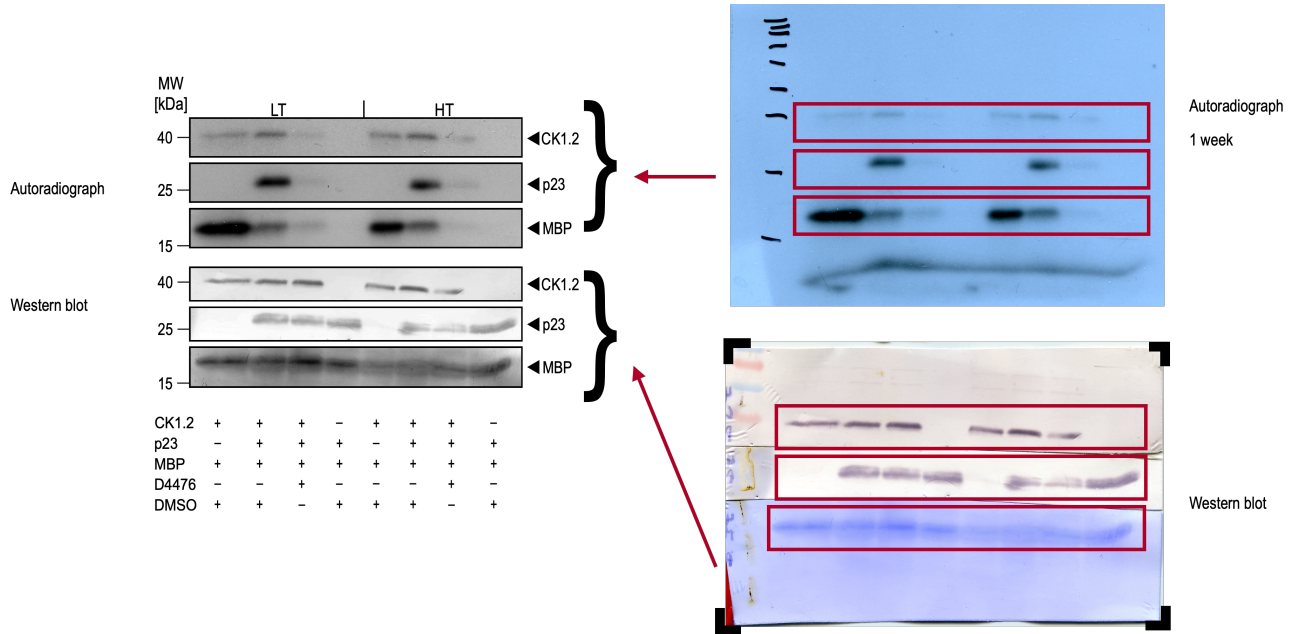



Supplementary Information

Additional data set for Fig.7:Repeat 2 p23

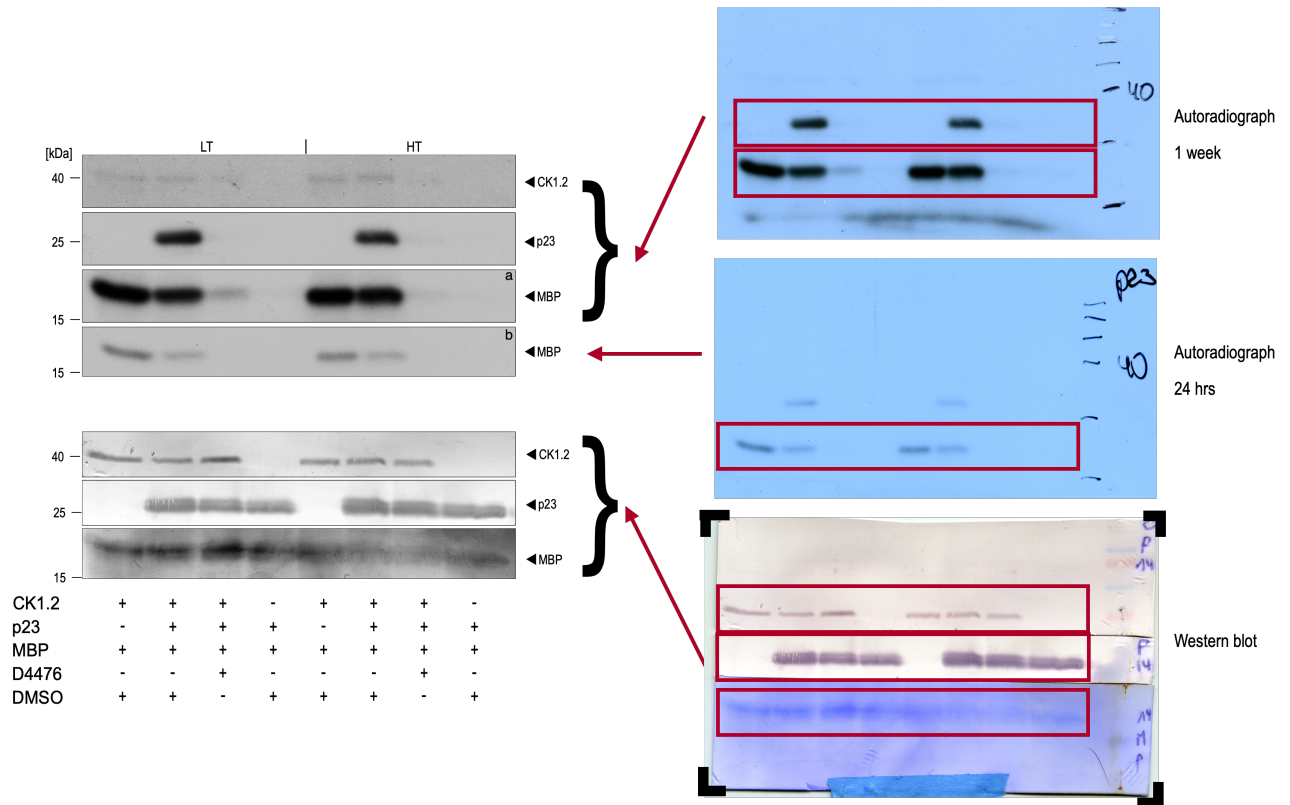

Supplementary Information

Additional data set for Fig.7: Repeat 3 p23

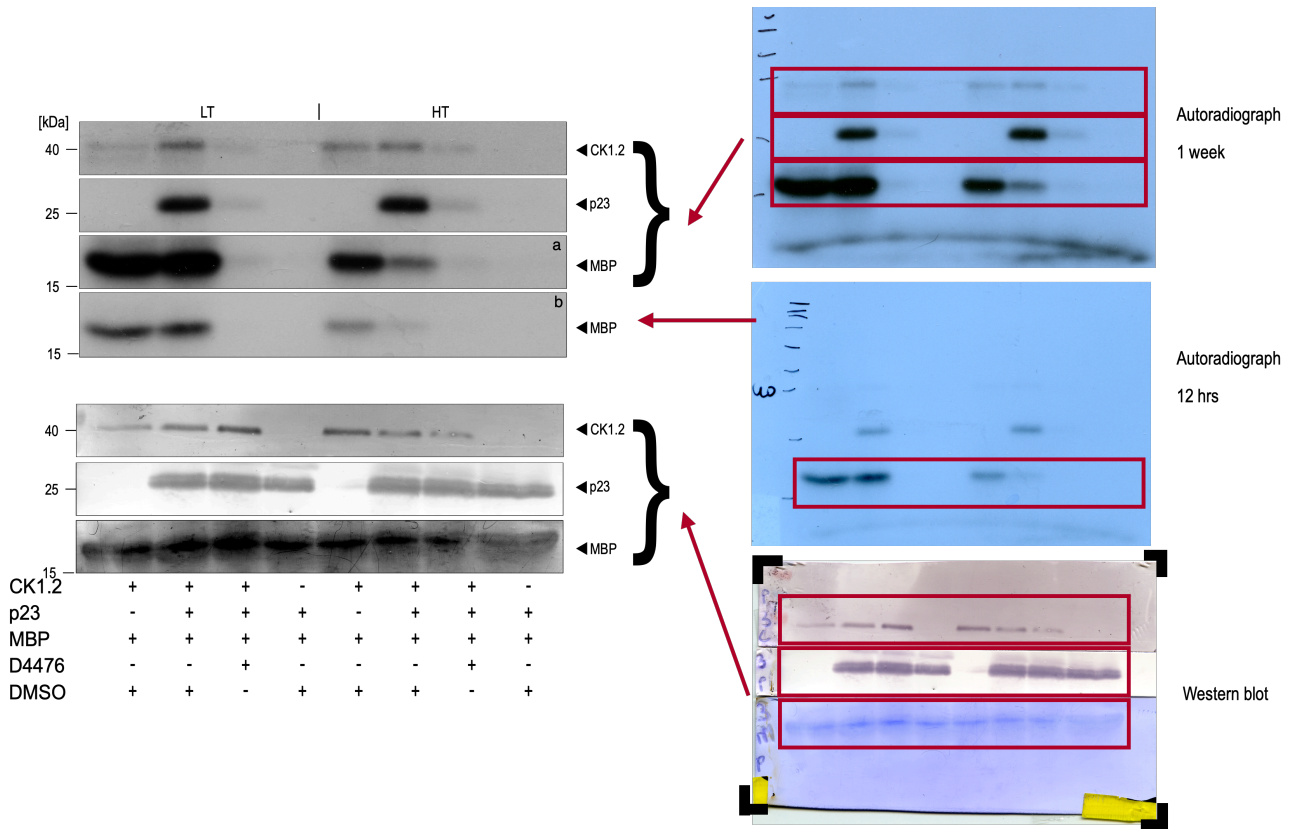

Supplementary Information

Additional data set for Fig.7: Repeat 4 p23

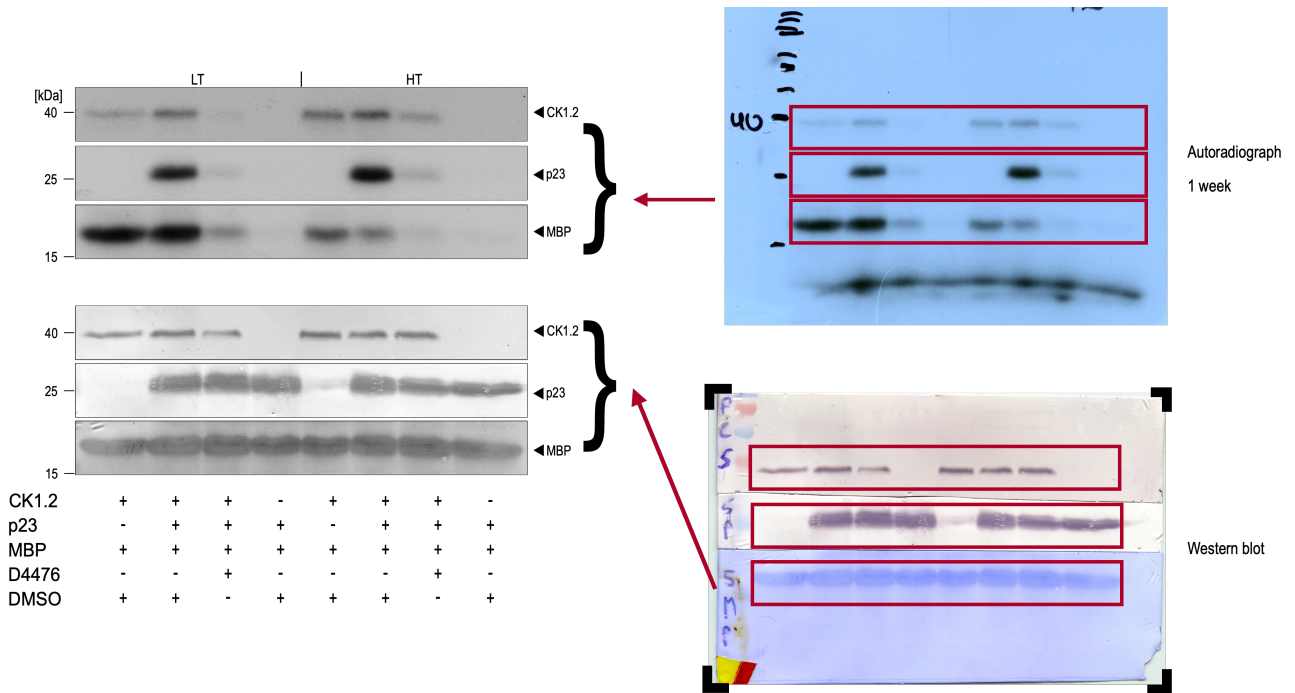

# Supplementary Information

Quantification of CK1.2 protein level shown in Fig S6 Repeat 1

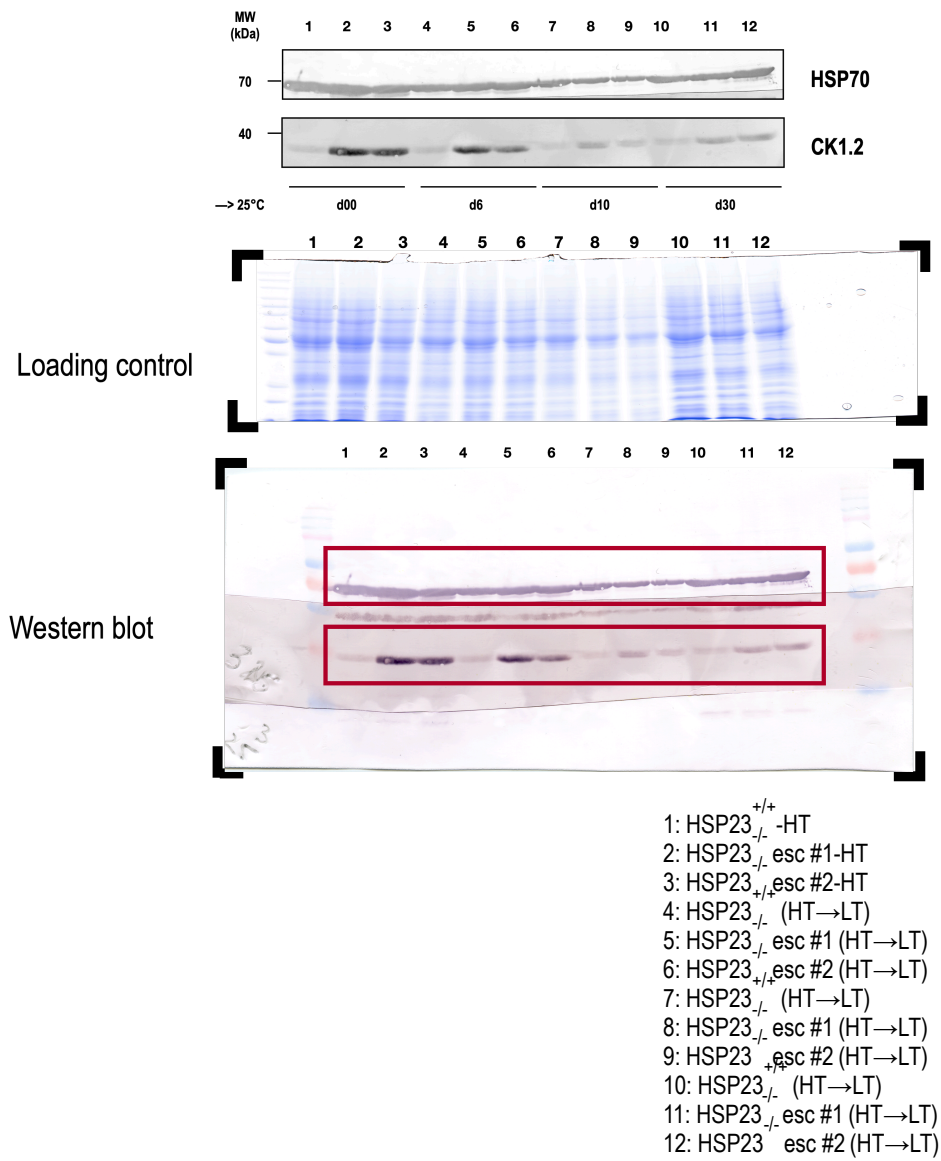

Supplementary Information

Quantification of CK1.2 protein level shown in Fig S6 Repeat 2+3

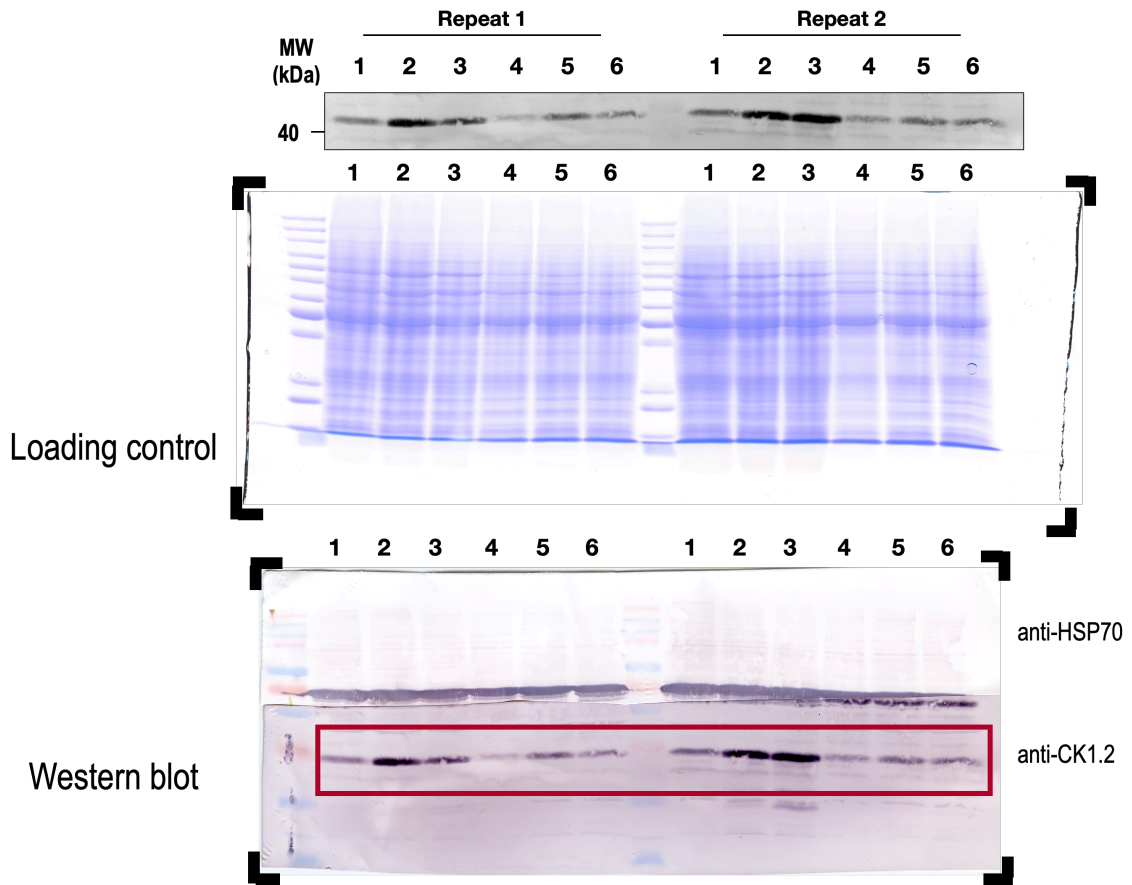

- 1: HSP23<sup>+/+</sup>-HT
- 2: HSP23<sup>-/-</sup> esc #1-HT
- 3: HSP23<sup>-/-</sup> esc #2-HT
- 4: HSP23<sup>+/+</sup> (HT→LT)
- 5: HSP23<sup>-/-</sup> esc #1 (HT→LT)
- 6: HSP23<sup>-/-</sup> esc #2 (HT→LT)
